# Supplementary material
Source: MDPI journal article supplement (https://www.mdpi.com/2311-5637/8/2/78)

## Supplementary Materials

**Table S1: *In silico* analysis for the specificity of the BSG method using SCREENED.** (A) From each animal, archaea, bacteria, fungi, plant protest and virus group from the NCBI Nucleotide RefSeq database, the number of sequences presenting a positive signal for the BSG method is indicated. (B) Description of the positive signals.

| (A)                                                       |                                                      | NCBI Nucleotide RefSeq database sequences groups |                                                                                                                                                                                                                                                                                                                                                                                                                                                                                                                                                                                                                                                                                                                                                                 |                   |        |        |         |        |
|-----------------------------------------------------------|------------------------------------------------------|--------------------------------------------------|-----------------------------------------------------------------------------------------------------------------------------------------------------------------------------------------------------------------------------------------------------------------------------------------------------------------------------------------------------------------------------------------------------------------------------------------------------------------------------------------------------------------------------------------------------------------------------------------------------------------------------------------------------------------------------------------------------------------------------------------------------------------|-------------------|--------|--------|---------|--------|
|                                                           |                                                      | Animal                                           | Archaea                                                                                                                                                                                                                                                                                                                                                                                                                                                                                                                                                                                                                                                                                                                                                         | Bacteria          | Fungi  | Plant  | Protist | Virus  |
| Sequence number with a positive signal for the BSG method |                                                      | 0                                                | 0                                                                                                                                                                                                                                                                                                                                                                                                                                                                                                                                                                                                                                                                                                                                                               | 167               | 0      | 0      | 0       | 0      |
| Total sequence number                                     |                                                      | 75,548                                           | 54,464                                                                                                                                                                                                                                                                                                                                                                                                                                                                                                                                                                                                                                                                                                                                                          | 11,507,253        | 86,250 | 46,015 | 89,957  | 10,108 |
| (B)                                                       |                                                      | Species                                          | Frequency                                                                                                                                                                                                                                                                                                                                                                                                                                                                                                                                                                                                                                                                                                                                                       | Accession numbers |        |        |         |        |
| <b><i>B. subtilis</i> group*</b>                          | <i>B. altitudinis</i> ( <i>B. pumilus</i> group)     | 9                                                | NZ_CP012482.1; NZ_CP018574.1; NZ_CP068389.1; NZ_LDJZ01000007.1; NZ_QCWN01000053.1; NZ_QENO01000024.1; NZ_VTEM01000053.1; NZ_CP012329.1; NZ_CP012330.1                                                                                                                                                                                                                                                                                                                                                                                                                                                                                                                                                                                                           |                   |        |        |         |        |
|                                                           | <i>B. amyloliquefaciens</i>                          | 14                                               | NC_014551.1; NC_020272.1; NZ_AWQY01000019.1; NZ_CP007242.1; NZ_CP014700.1; NZ_CP014783.1; NZ_CP018152.1; NZ_CP018200.1; NZ_CP038028.1; NZ_CP054479.1; NZ_CP061852.1; NZ_LDHQ01000012.1; NZ_QVEJ01000071.1; NZ_AJST01000001.1                                                                                                                                                                                                                                                                                                                                                                                                                                                                                                                                    |                   |        |        |         |        |
|                                                           | <i>B. licheniformis</i>                              | 11                                               | NZ_AVEZ01000017.1; NZ_CP014842.1; NZ_CP022477.1; NZ_CP025226.1; NZ_CP065647.1; NZ_JFYM01000035.1; NZ_LDHH01000013.1; NZ_MIPQ01000020.1; NZ_MIZD01000018.1; NZ_NQLG01000457.1; NZ_VEGU01000065.1                                                                                                                                                                                                                                                                                                                                                                                                                                                                                                                                                                 |                   |        |        |         |        |
|                                                           | <i>B. pumilus</i>                                    | 8                                                | NZ_CP016784.1; NZ_CP058951.1; NZ_JACNYY010000068.1; NZ_JACNZG010000034.1; NZ_JACNZV010000074.1; NZ_UWJF01000028.1; NZ_VTEO01000003.1; NZ_VTEP01000003.1                                                                                                                                                                                                                                                                                                                                                                                                                                                                                                                                                                                                         |                   |        |        |         |        |
|                                                           | <i>B. halotolerans</i> ( <i>B. mojavensis</i> group) | 4                                                | NZ_CP029364.1; NZ_MBQV01000017.1; NZ_PVXA01000035.1; NZ_PVXC01000085.1                                                                                                                                                                                                                                                                                                                                                                                                                                                                                                                                                                                                                                                                                          |                   |        |        |         |        |
|                                                           | <i>B. safensis</i> ( <i>B. pumilus</i> group)        | 8                                                | NZ_CP015607.1; NZ_CP015611.1; NZ_CP018100.1; NZ_CP043404.1; NZ_JAEACH010000001.1; NZ_LDFH01000001.1; NZ_LDGD01000006.1; NZ_LZRH01000005.1                                                                                                                                                                                                                                                                                                                                                                                                                                                                                                                                                                                                                       |                   |        |        |         |        |
|                                                           | <i>B. stratosphericus</i> ( <i>B. pumilus</i> group) | 2                                                | NZ_MWKO01000142.1; NZ_SPPG01000370.1                                                                                                                                                                                                                                                                                                                                                                                                                                                                                                                                                                                                                                                                                                                            |                   |        |        |         |        |
|                                                           | <i>B. subtilis</i>                                   | 42                                               | NC_019896.1; NZ_BDCV01000028.1; NZ_CP009684.1; NZ_CP009796.1; NZ_CP013654.1; NZ_CP015375.1; NZ_CP021123.1; NZ_CP028202.1; NZ_CP028209.1; NZ_CP028213.1; NZ_CP028217.1; NZ_CP028218.1; NZ_CP028812.1; NZ_CP032315.1; NZ_CP046448.1; NZ_CP064818.1; NZ_JAAEBI010000014.1; NZ_JAAEBK010000011.1; NZ_JABFHE010000130.1; NZ_JA-BUOT010000018.1; NZ_KZ848487.1; NZ_LDFK01000020.1; NZ_LDGB01000018.1; NZ_LJSM01000017.1; NZ_LZOV01000074.1; NZ_MAFZ01000007.1; NZ_MAFZ01000010.1; NZ_ML241291.1; NZ_NQYD01000001.1; NZ_PYBK01000049.1; NZ_QFZO01000054.1; NZ_QSNC01000001.1; NZ_QVMX01000069.1; NZ_QZDE02000003.1; NZ_RFFO01000030.1; NZ_SIWZ01000001.1; NZ_VEGG01000015.1; NZ_VTEK01000005.1; NZ_WOVJ01000047.1; NZ_UAQD01000006.1; NZ_KN049967.1; NZ_CLNG01000048.1 |                   |        |        |         |        |
|                                                           | <i>B. vallismortis</i>                               | 1                                                | NZ_CP026362.1                                                                                                                                                                                                                                                                                                                                                                                                                                                                                                                                                                                                                                                                                                                                                   |                   |        |        |         |        |
|                                                           | <i>B. velezensis</i>                                 | 51                                               | NC_009725.2; NC_020410.1; NC_022075.1; NC_022081.1; NZ_CP009679.1; NZ_CP010556.1; NZ_CP011278.1; NZ_CP011347.1; NZ_CP011937.1; NZ_CP018007.1; NZ_CP020874.1; NZ_CP022556.1; NZ_CP022654.2; NZ_CP023341.1; NZ_CP023414.1; NZ_CP027429.1; NZ_CP028207.1; NZ_CP028211.1; NZ_CP028439.1; NZ_CP028440.1; NZ_CP029034.1; NZ_CP029296.1;                                                                                                                                                                                                                                                                                                                                                                                                                               |                   |        |        |         |        |

NZ\_CP029473.1; NZ\_CP031694.1; NZ\_CP033967.1;  
 NZ\_CP035533.1; NZ\_CP036518.1; NZ\_CP036527.1;  
 NZ\_CP039297.1; NZ\_CP041145.1; NZ\_CP042271.1;  
 NZ\_CP053717.1; NZ\_CP059344.1; NZ\_CP059855.1;  
 NZ\_CP060085.1; NZ\_CP063157.1; NZ\_CP063687.1;  
 NZ\_CP063768.1; NZ\_JAAHBR010000031.1;  
 NZ\_JAAKXX010000009.1; NZ\_KZ155841.1;  
 NZ\_LSZL01000040.1; NZ\_MBDV01000014.1;  
 NZ\_MPHE01000018.1; NZ\_MSXY01000073.1;  
 NZ\_PEMY01000036.1; NZ\_PVHM01000026.1;  
 NZ\_RPOD01000030.1; NZ\_VANQ01000027.1;  
 NZ\_VEWV01000017.1; NZ\_VEWZ01000020.1

|                                     |                                                  |    |                                                                                                                                                                                                                                                                                          |
|-------------------------------------|--------------------------------------------------|----|------------------------------------------------------------------------------------------------------------------------------------------------------------------------------------------------------------------------------------------------------------------------------------------|
|                                     | <i>B. xiamenensis</i> ( <i>B. pumilus</i> group) | 2  | NZ_CP017786.1; NZ_LDHZ01000020.1                                                                                                                                                                                                                                                         |
| <b>Unclassified <i>Bacillus</i></b> | <i>Bacillus</i> sp.                              | 15 | NZ_BDJJ01000001.1; NZ_CP017072.1; NZ_CP019626.1;<br>NZ_CP025258.1; NZ_CP027061.1; NZ_CP046653.1;<br>NZ_CP060193.1; NZ_JAESPO010000027.1;<br>NZ_JAESPP010000073.1; NZ_LKCP01000046.1;<br>NZ_LKCP01000056.1; NZ_LMRK01000001.1;<br>NZ_PJCT01000020.1; NZ_RPSG01000024.1; NZ_RPSI01000032.1 |

\* <https://www.ncbi.nlm.nih.gov/Taxonomy/Browser/wwwtax.cgi?id=653685>.

**Table S2: Misclassification of NZ\_CLNG01000048.1.** From analysis performed in Table S1, a sequence (Accession number: NZ\_CLNG01000048.1) classified as belonging to *Streptococcus pneumoniae* presented a PCR amplification for the BSG method. However, based on further investigations (see below), this sequence was shown as belonging to *Bacillus subtilis*.

NZ\_CLNG01000048.1 blasted against nr/nt NCBI database

| Sequences producing significant alignments                                                                    |                                                                                           |                                       |           |             |             |         |            |          |                            |
|---------------------------------------------------------------------------------------------------------------|-------------------------------------------------------------------------------------------|---------------------------------------|-----------|-------------|-------------|---------|------------|----------|----------------------------|
| Download <span>▼</span> <span>New</span> Select columns <span>▼</span> Show 100 <span>▼</span> <span>?</span> |                                                                                           |                                       |           |             |             |         |            |          |                            |
| <input checked="" type="checkbox"/> select all 100 sequences selected                                         |                                                                                           |                                       |           |             |             |         |            |          |                            |
| GenBank Graphics Distance tree of results <span>New</span> MSA Viewer                                         |                                                                                           |                                       |           |             |             |         |            |          |                            |
|                                                                                                               | Description                                                                               | Scientific Name                       | Max Score | Total Score | Query Cover | E value | Per. Ident | Acc. Len | Accession                  |
| <input checked="" type="checkbox"/>                                                                           | <a href="#">Bacillus subtilis strain SRCM102751 chromosome, complete genome</a>           | <a href="#">Bacillus subtilis</a>     | 8547      | 1.353e+05   | 99%         | 0.0     | 99.87%     | 4047680  | <a href="#">CP028217.1</a> |
| <input checked="" type="checkbox"/>                                                                           | <a href="#">Bacillus subtilis strain SEM-9 chromosome, complete genome</a>                | <a href="#">Bacillus subtilis</a>     | 8543      | 1.354e+05   | 99%         | 0.0     | 99.85%     | 4121982  | <a href="#">CP021123.1</a> |
| <input checked="" type="checkbox"/>                                                                           | <a href="#">Bacillus subtilis strain SRCM103629 chromosome, complete genome</a>           | <a href="#">Bacillus subtilis</a>     | 8543      | 1.354e+05   | 99%         | 0.0     | 99.85%     | 4129860  | <a href="#">CP035413.1</a> |
| <input checked="" type="checkbox"/>                                                                           | <a href="#">Bacillus subtilis subsp. subtilis strain SRCM101392, complete genome</a>      | <a href="#">Bacillus subtilis</a> ... | 8540      | 1.353e+05   | 99%         | 0.0     | 99.85%     | 4147173  | <a href="#">CP021921.1</a> |
| <input checked="" type="checkbox"/>                                                                           | <a href="#">Bacillus subtilis strain 75 chromosome, complete genome</a>                   | <a href="#">Bacillus subtilis</a>     | 8534      | 1.353e+05   | 99%         | 0.0     | 99.83%     | 4156459  | <a href="#">CP045825.1</a> |
| <input checked="" type="checkbox"/>                                                                           | <a href="#">Bacillus subtilis strain PR10 chromosome, complete genome</a>                 | <a href="#">Bacillus subtilis</a>     | 8534      | 1.354e+05   | 99%         | 0.0     | 99.83%     | 4073059  | <a href="#">CP040528.1</a> |
| <input checked="" type="checkbox"/>                                                                           | <a href="#">Bacillus subtilis strain H19 chromosome, complete genome</a>                  | <a href="#">Bacillus subtilis</a>     | 8534      | 1.353e+05   | 99%         | 0.0     | 99.83%     | 4063004  | <a href="#">CP039935.1</a> |
| <input checked="" type="checkbox"/>                                                                           | <a href="#">Bacillus subtilis strain SRCM103637 chromosome, complete genome</a>           | <a href="#">Bacillus subtilis</a>     | 8534      | 1.352e+05   | 99%         | 0.0     | 99.83%     | 4027238  | <a href="#">CP035414.1</a> |
| <input checked="" type="checkbox"/>                                                                           | <a href="#">Bacillus subtilis strain SRCM103641 chromosome, complete genome</a>           | <a href="#">Bacillus subtilis</a>     | 8534      | 1.352e+05   | 99%         | 0.0     | 99.83%     | 4110403  | <a href="#">CP035390.1</a> |
| <input checked="" type="checkbox"/>                                                                           | <a href="#">Bacillus subtilis subsp. subtilis strain SRCM100761, complete genome</a>      | <a href="#">Bacillus subtilis</a> ... | 8534      | 1.352e+05   | 99%         | 0.0     | 99.83%     | 3988630  | <a href="#">CP021889.1</a> |
| <input checked="" type="checkbox"/>                                                                           | <a href="#">Bacillus subtilis subsp. subtilis strain SRCM100757, complete genome</a>      | <a href="#">Bacillus subtilis</a> ... | 8534      | 1.352e+05   | 99%         | 0.0     | 99.83%     | 3988649  | <a href="#">CP021499.1</a> |
| <input checked="" type="checkbox"/>                                                                           | <a href="#">Bacillus subtilis subsp. subtilis strain SRCM101444, complete genome</a>      | <a href="#">Bacillus subtilis</a> ... | 8534      | 1.352e+05   | 99%         | 0.0     | 99.83%     | 3988602  | <a href="#">CP021498.1</a> |
| <input checked="" type="checkbox"/>                                                                           | <a href="#">Bacillus subtilis strain GQJK2, complete genome</a>                           | <a href="#">Bacillus subtilis</a>     | 8534      | 1.354e+05   | 99%         | 0.0     | 99.83%     | 4072961  | <a href="#">CP020367.1</a> |
| <input checked="" type="checkbox"/>                                                                           | <a href="#">Bacillus subtilis strain SRCM102749 chromosome, complete genome</a>           | <a href="#">Bacillus subtilis</a>     | 8528      | 1.353e+05   | 99%         | 0.0     | 99.81%     | 4192708  | <a href="#">CP028213.1</a> |
| <input checked="" type="checkbox"/>                                                                           | <a href="#">Bacillus subtilis subsp. subtilis strain MH-1 chromosome, complete genome</a> | <a href="#">Bacillus subtilis</a> ... | 8528      | 1.351e+05   | 99%         | 0.0     | 99.81%     | 4184648  | <a href="#">CP032853.1</a> |
| <input checked="" type="checkbox"/>                                                                           | <a href="#">Bacillus subtilis strain SRCM103697 chromosome, complete genome</a>           | <a href="#">Bacillus subtilis</a>     | 8528      | 1.352e+05   | 99%         | 0.0     | 99.81%     | 4072580  | <a href="#">CP035395.1</a> |
| <input checked="" type="checkbox"/>                                                                           | <a href="#">Bacillus subtilis strain SRCM103773 chromosome, complete genome</a>           | <a href="#">Bacillus subtilis</a>     | 8528      | 1.353e+05   | 99%         | 0.0     | 99.81%     | 4052954  | <a href="#">CP035397.1</a> |
| <input checked="" type="checkbox"/>                                                                           | <a href="#">Bacillus subtilis strain SRCM103576 chromosome, complete genome</a>           | <a href="#">Bacillus subtilis</a>     | 8528      | 1.352e+05   | 99%         | 0.0     | 99.81%     | 4012178  | <a href="#">CP035402.1</a> |

Presence of *Bacillus* and *Streptococcus* population in the sample based on Kraken analysis on the assembly.

## Streptococcus pneumoniae strain SMRU2731, whole genome shotgun sequence

NCBI Reference Sequence: NZ\_CLNG01000048.1

[FASTA](#) [Graphics](#)

Go to: ☐

LOCUS NZ\_CLNG01000048 7703 bp DNA linear CON 23-OCT-2020  
 DEFINITION Streptococcus pneumoniae strain SMRU2731, whole genome shotgun sequence.  
 ACCESSION NZ\_CLNG01000048 [NZ\\_CLNG01000000](#)  
 VERSION NZ\_CLNG01000048.1  
 DBLINK BioProject: [PRJNA224116](#)  
 BioSample: [SAMEA1028711](#)  
 Assembly: [GCF\\_001140205.1](#)

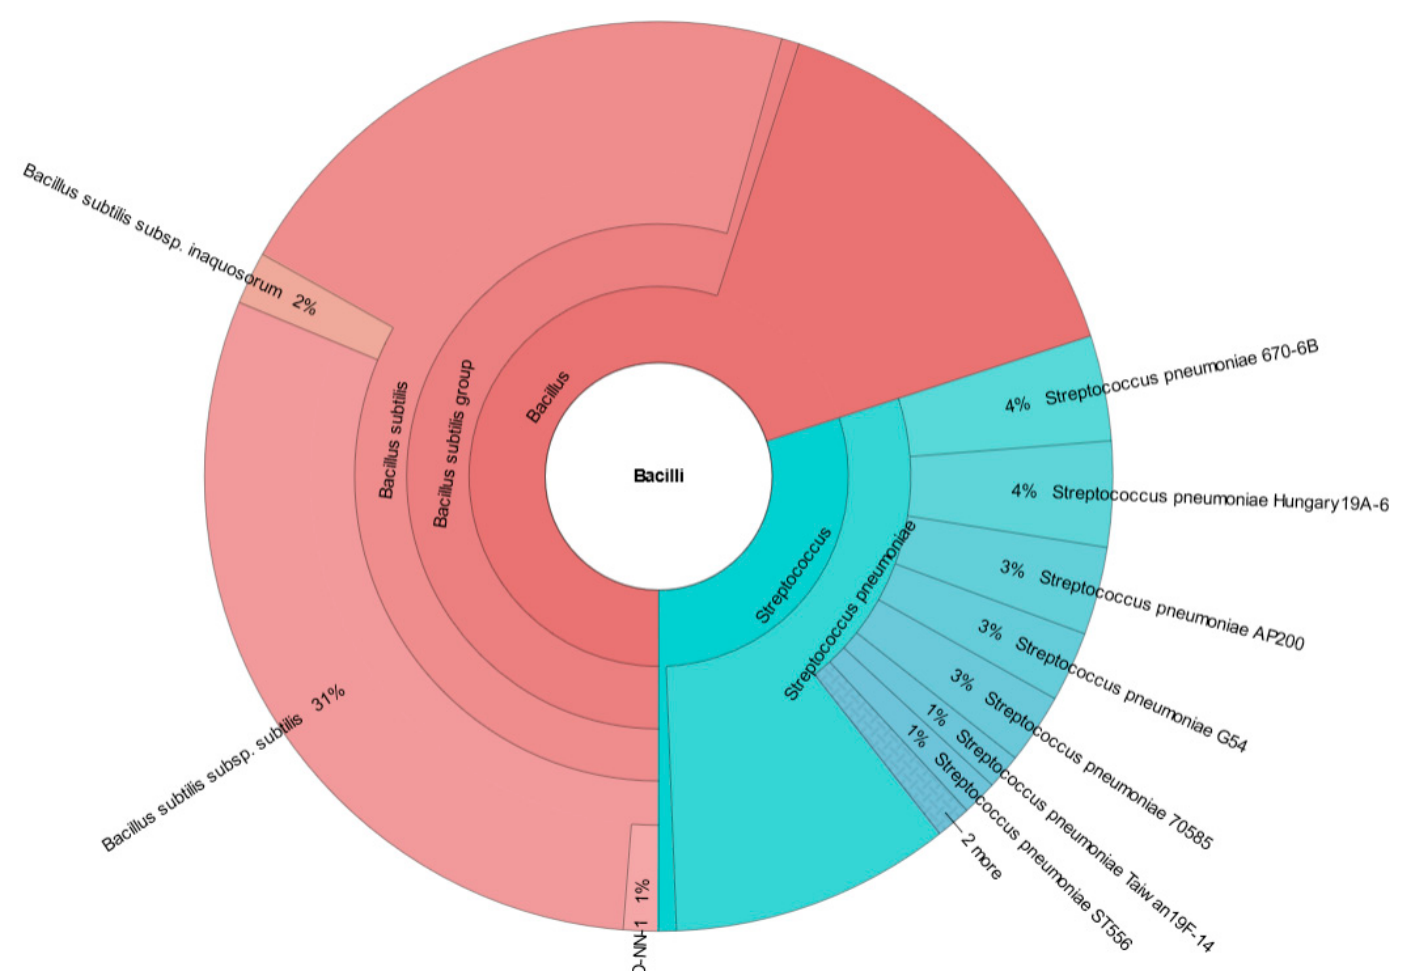

**Table S3: Calculation of  $LOD_{95\%}$  based on the POD curve for the developed real-time PCR BSG method.** To this end, based on Table 3, the “Validation of qualitative PCR methods within a single laboratory” web-tool (<https://quodata.de/content/validation-qualitative-pcr-methods-single-laboratory>) was used as previously described [36–37].

#### Please enter your data

1<sup>st</sup> column: Number of copies of the target DNA sequence (= nominal copies)

2<sup>nd</sup> column: Number of positive test results

3<sup>rd</sup> column: Number of PCR replicates

[Click here to insert example data](#)

|     |    |    |
|-----|----|----|
| 0.1 | 0  | 12 |
| 1   | 1  | 12 |
| 5   | 6  | 12 |
| 10  | 8  | 12 |
| 20  | 12 | 12 |
| 100 | 12 | 12 |

[Clear data](#)

Start the calculation

#### Results

##### Plausibility Check

The plausibility check indicates no irregularities.

##### POD curve and $LOD_{95\%}$

The  $LOD_{95\%}$  is 22.025 with a 95 % confidence interval of [14.426, 33.770].

The figure below summarises the results. The blue diamonds characterise the laboratory-specific RODs. The blue curve denotes the mean POD curve along with the corresponding 95 % confidence range highlighted as the grey band. The POD curve under ideal conditions is displayed as the black dashed curve.

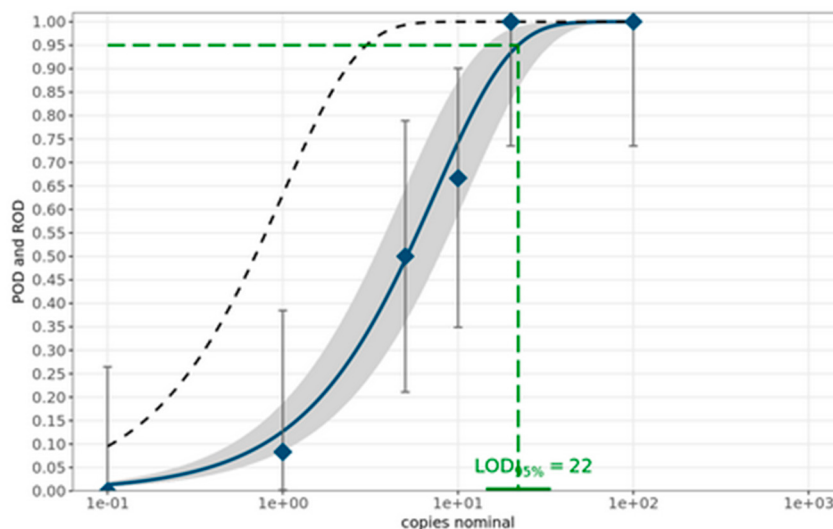

Supplement: s1 [file s1 › fermentation-1575883-supplementary.pdf]
